# Supplementary material for: β-Barrel Nanopores with an Acidic–Aromatic Sensing Region Identify Proteinogenic Peptides at Low pH
Source: PubMed Central journal article supplement (PMC9134492; doi:10.1021/acsnano.1c11455), 2022-03-18
Supplement: nn1c11455_si_001.pdf [file nn1c11455_si_001.pdf]

## **$\beta$ -barrel Nanopores with an Acidic-Aromatic Sensing Region identify Proteinogenic Peptides at low pH**

*Roderick Corstiaan Abraham Versloot<sup>1</sup>, Sabine Angenieta Paulina Straathof<sup>1</sup>, Gemma Stouwie<sup>1</sup>, Matthijs Jonathan Tadema<sup>1</sup>, Giovanni Maglia<sup>\*1</sup>*

<sup>1</sup> Groningen Biomolecular Sciences and Biotechnology Institute, University of Groningen, Groningen, 9747AG, Netherlands

\* Correspondence: [g.maglia@rug.nl](mailto:g.maglia@rug.nl)

## Table of content

|                                                                                                                                |      |
|--------------------------------------------------------------------------------------------------------------------------------|------|
| Figure S1: Additional ionic current traces of aerolysin nanopores                                                              | P.3  |
| Figure S2: Ionic current traces and event characteristics of Aer <sup>K238Q</sup> and Aer <sup>K238F</sup>                     | P.4  |
| Figure S3: IV curves of aerolysin Lys238 mutants.                                                                              | P.5  |
| Figure S4: Measurement of lysozyme digest and individual peptides in the same AerK238D+A260F nanopore.                         | P.6  |
| Figure S5: Detection of small peptides                                                                                         | P.7  |
| Figure S6: Voltage dependency of the resolution between Lys4 and Lys5 in AerK238+S264F                                         | P.8  |
| Figure S7: Homology model for the structure of CytK                                                                            | P.9  |
| Figure S8: Ionic current traces and event characteristics of CytK <sup>S126F</sup> , and CytK <sup>S126F+K128D</sup> at pH 3.0 | P.10 |
| Figure S9: IV curves CytK mutants                                                                                              | P.11 |
| Figure S10: Schematic illustration of the positions of charged residues in the lumen of the nanopore                           | P.12 |
| Table S1: Expected peptide fragments after tryptic digestion of Lysozyme                                                       | P.13 |
| Table S2: Mass-spectrometry measurement of trypsinated lysozyme                                                                | P.13 |
| Table S3: Resolution of peptides in the phenylalanine mutants                                                                  | P.14 |
| Table S4: Reversal potential measurements of aerolysin and CytK nanopores                                                      | P.14 |
| Table S5: Ionic current of aerolysin mutants in 1M KCl at pH 3.8                                                               | P.15 |
| Table S6: Ionic current of CytK mutants in 1M KCl at pH 3.8                                                                    | P.16 |
| Amino acid sequence and DNA sequence of pro-AerWt and CytK <sup>Wt</sup>                                                       | P.17 |

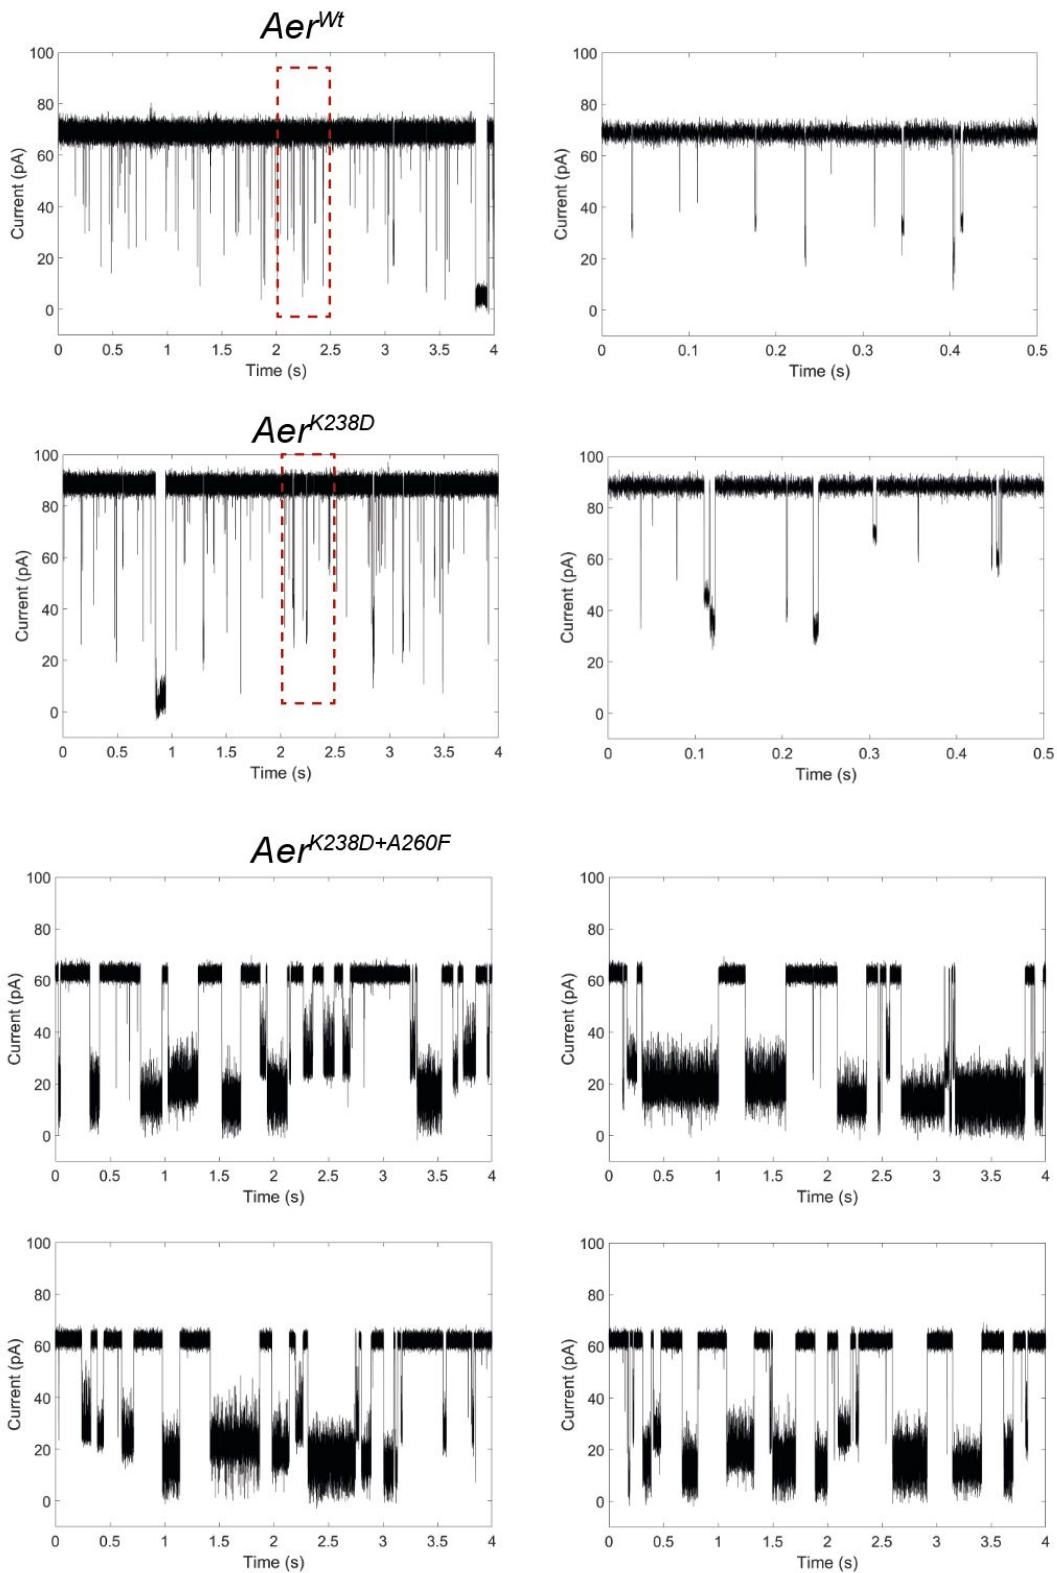

**Figure S1:** Additional ionic current traces of aerolysin nanopores. Events in aerolysin nanopores after the addition of 10 ng/ $\mu$ l of trypsinated lysozyme. For  $Aer^{Wt}$  (pH 3.8) and  $Aer^{K238D}$  (pH 3.0) the right current trace is an expansion of the left trace as indicated. For  $Aer^{K238D+A260F}$  (pH 3.0), four different current traces are indicated. Data recorded in 1 M KCl, 50 mM citric acid, buffered to the final pH value using bis-tris propane at an applied potential of +150 mV. An additional 5 kHz Bessel filter was applied to the data shown in this figure.

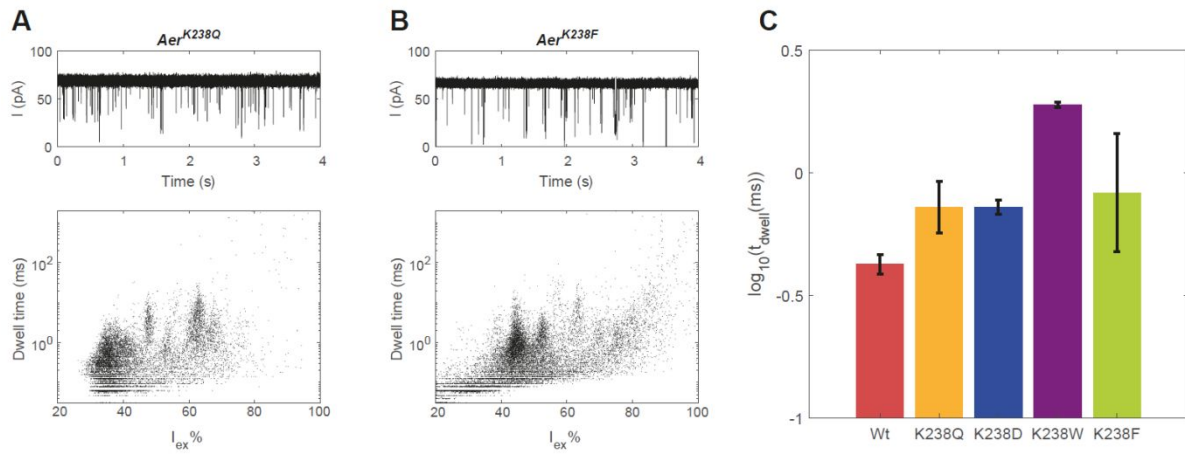

**Figure S2:** Ionic current traces and event characteristics of (A)  $Aer^{K238Q}$  and (B)  $Aer^{K238F}$  after the addition of 4  $\mu$ g trypsinated lysozyme in the *cis* compartment. The final concentration of trypsinated lysozyme is 10 ng/ $\mu$ l. Data recorded at +150 mV applied potential in 1 M KCl and 50 mM citric acid, buffered to pH 3.8 using bis-tris propane. (C) Average dwell times of  $Aer^{Wt}$  and Lys238 mutants. Error bars indicate the standard deviation between three measurements in three different pores.

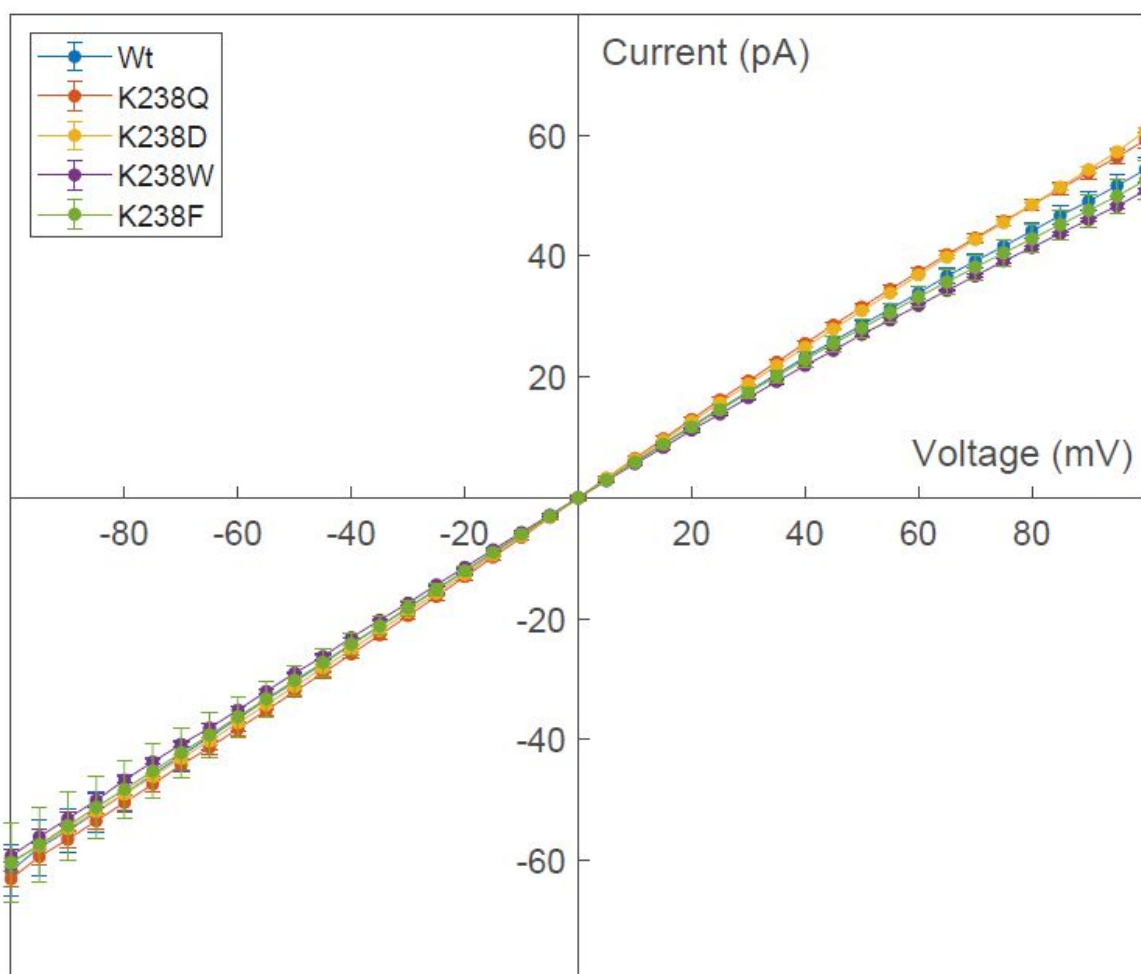

**Figure S3: IV curves of aerolysin Lys238 mutants.** Data recorded in 1 M KCl and 50 mM citric acid, buffered to pH 3.8 using bis-tris propane. Error bars indicate the standard deviation between measurements in at least three different nanopores.

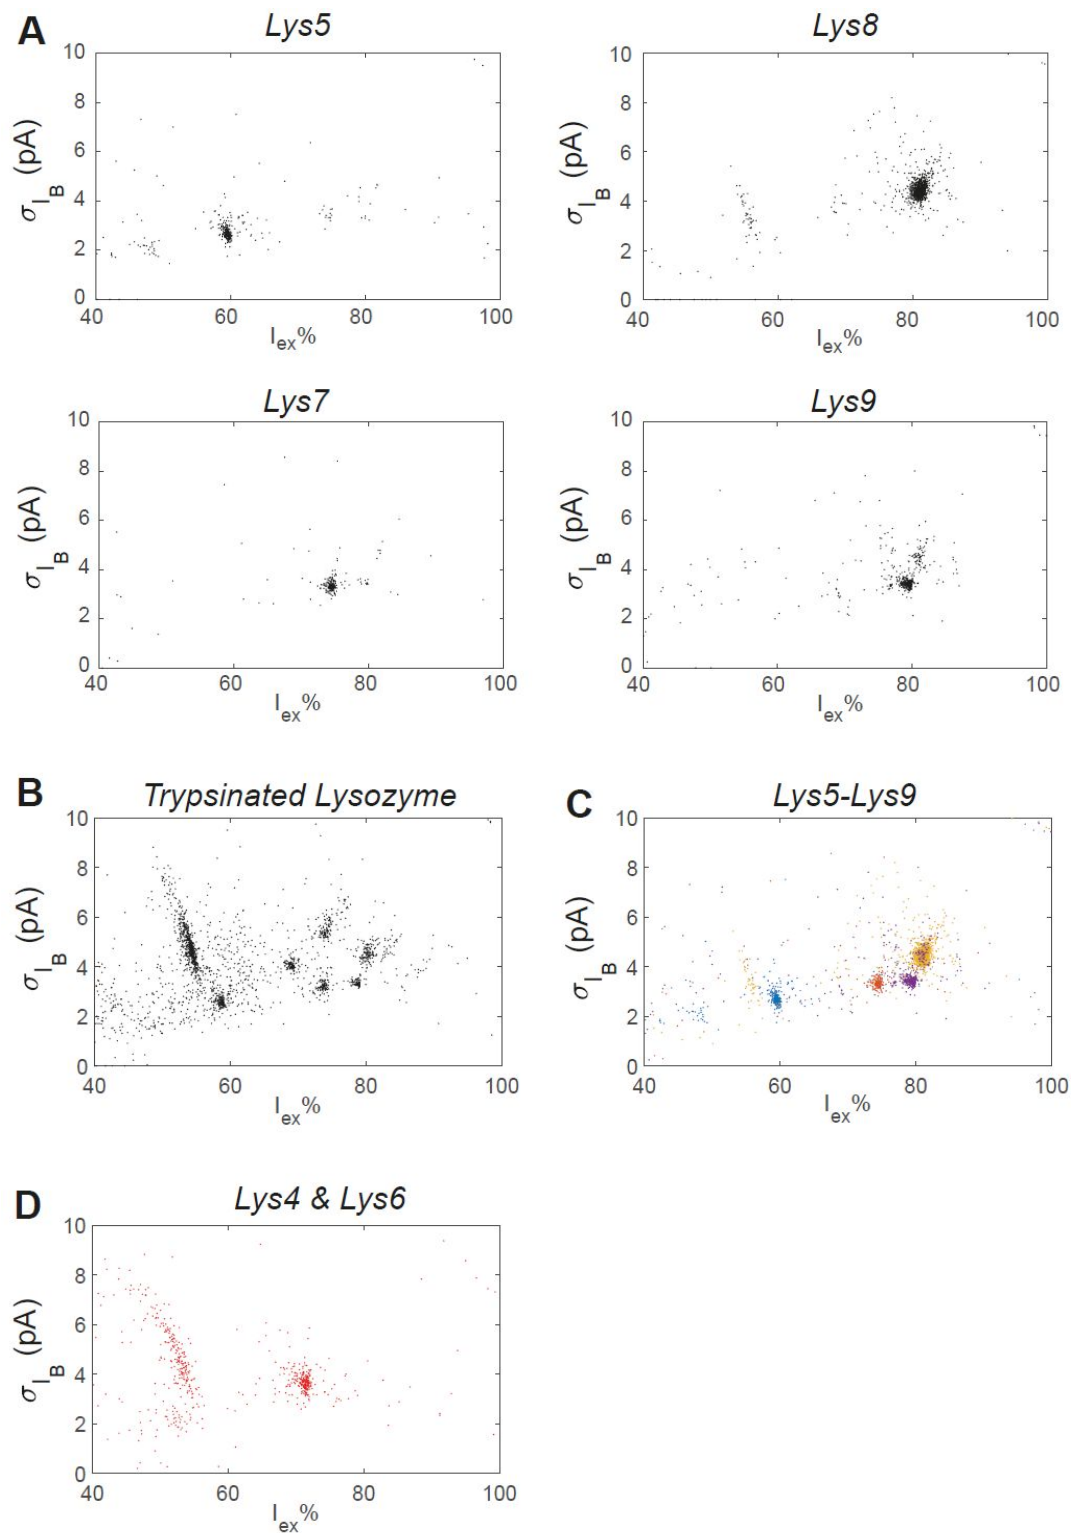

**Figure S4: Measurement of lysozyme digest and individual synthetic peptides in the same Aer<sup>K238D+A260F</sup> nanopore.** (A) nanopore spectrum of synthetic peptides. The chamber was perfused with fresh buffer in between the measurements of the lysozyme digest and each individual peptide. The measurement of Lys9 contained a trace amount of Lys8, because not all peptide was perfused out of the chamber. (B) The same nanopore was then used to test the spectrum of trypsinated lysozyme. (C) nanopore spectrum of the synthetic peptides: lys5 (blue), lys7 (orange), lys8 (yellow) and lys9 (purple). (D) Peptides Lys 4+6 measured in a different nanopore.

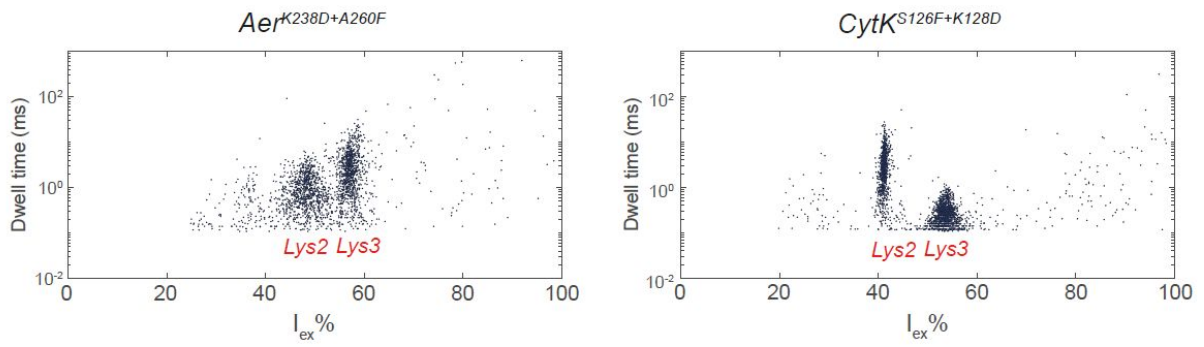

**Figure S5: Detection of small peptides.** Nanopore spectrum after the addition of 10  $\mu\text{M}$  Lys1, Lys2 and Lys3 to *Aer*<sup>K238D+A260F</sup> (left) and *CytK*<sup>S126F+K128D</sup> nanopores. Data recorded at +150 mV applied potential (aerolysin) or +100 mV applied potential (*CytK*) in 1 M KCl and 50 mM citric acid, buffered to pH 3.0 using bis-tris propane.

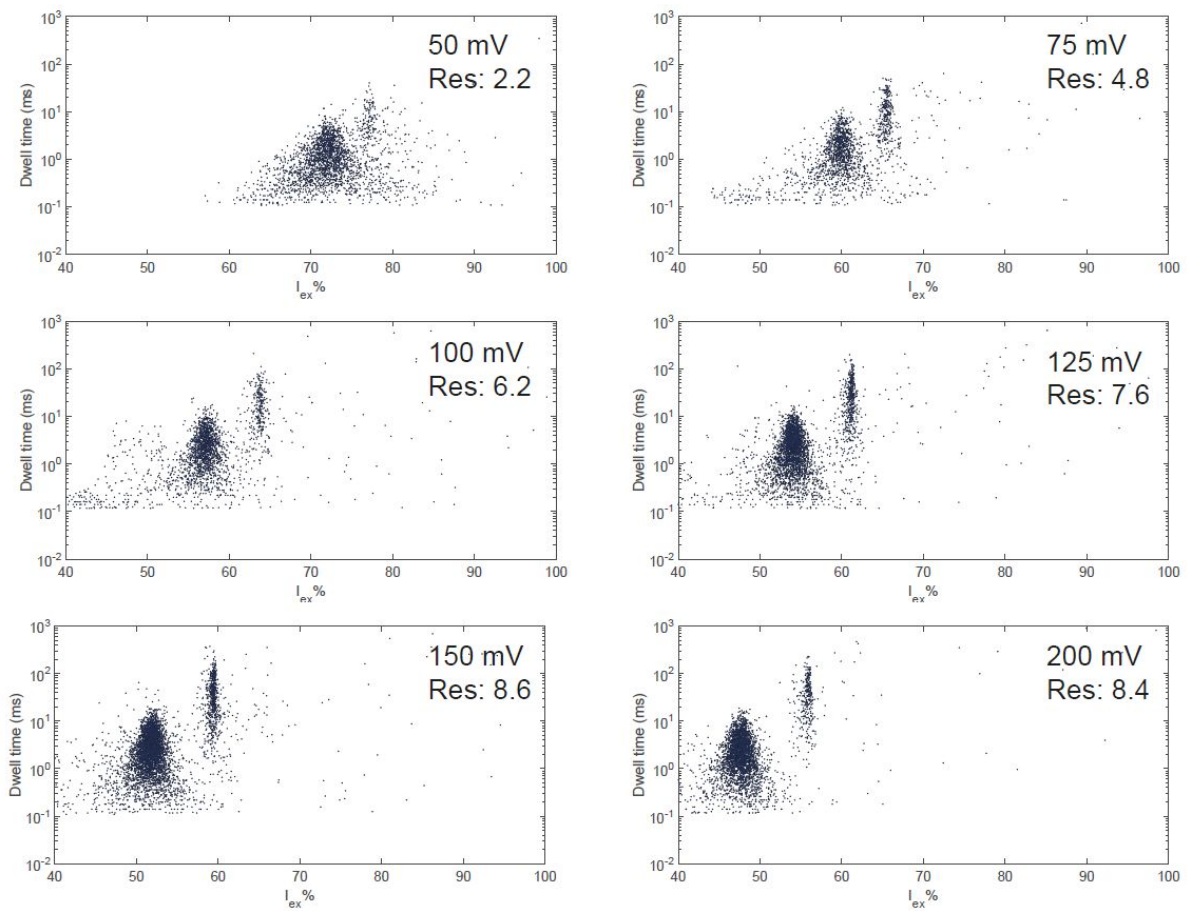

**Figure S6:** Voltage dependency of the resolution between Lys4 and Lys5 in Aer<sup>K238+S264F</sup>. The figure shows the nanopore spectra after addition of a mixture of 2.5  $\mu$ M Lys4 and 5  $\mu$ M Lys5 to the *cis* chamber. Data recorded at +150 mV applied potential in 1 M KCl and 50 mM citric acid, buffered to 3.0 using bis-tris propane.



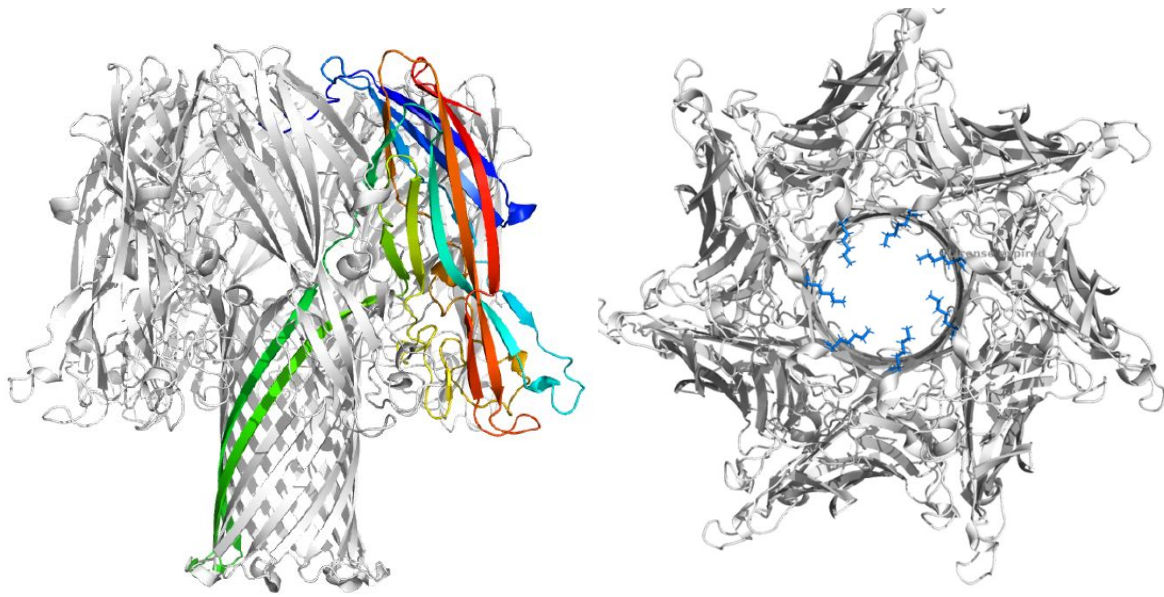

**Figure S7:** Homology model for the structure of CytK (left) and location of residue Lys128 (colored blue) at the bottom of the barrel (right)

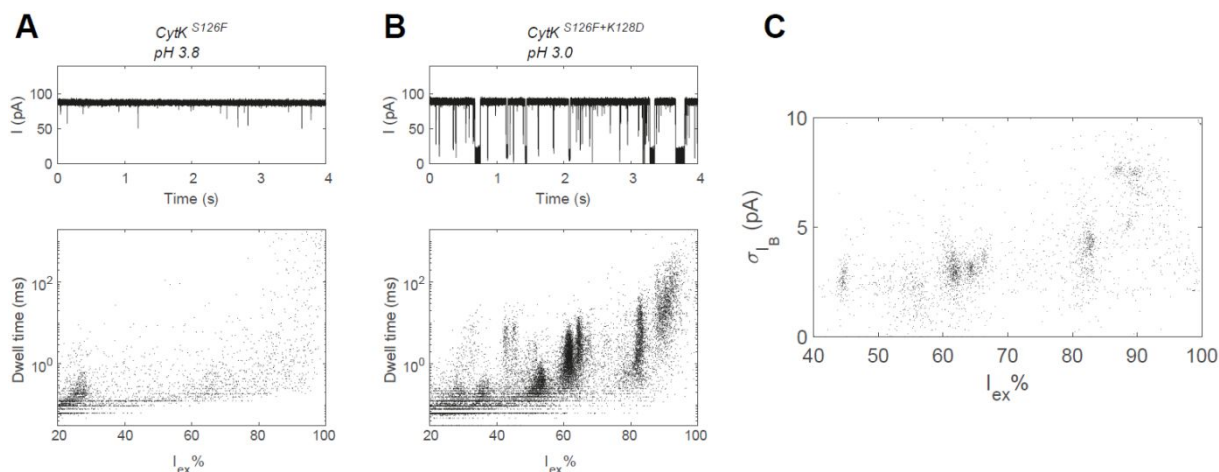

**Figure S8:** Ionic current traces and event characteristics of (A) CytK<sup>S126F</sup> at pH 3.8 and (B) CytK<sup>S126F+K128D</sup> at pH 3.0 after the addition of 4  $\mu$ g trypsinated lysozyme in the *trans* compartment. The final concentration of trypsinated lysozyme is 10 ng/ $\mu$ l. (C) I<sub>ex</sub>% vs event noise ( $\sigma_{I_B}$ ) plot of the events detected in CytK<sup>S126+K128D</sup> after the addition of 4  $\mu$ g trypsinated lysozyme in the *cis* compartment at pH 3.8. Data recorded at 150 mV applied potential in 1 M KCl and 50 mM citric acid, buffered to pH 3.8 or 3.0 using bis-tris propane.

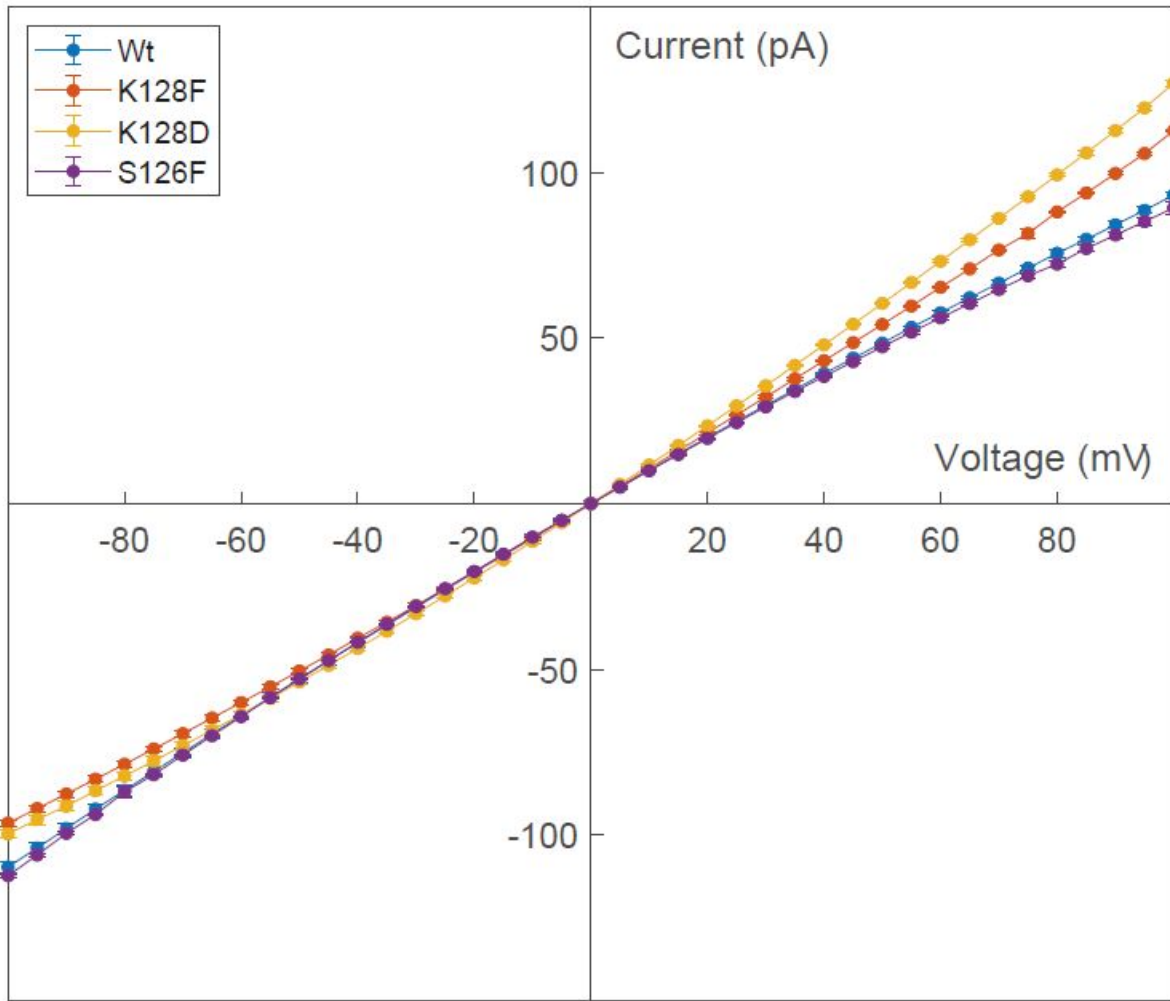

**Figure S9: IV curves CytK mutants.** Data recorded in 1 M KCl and 50 mM citric acid, buffered to pH 3.8 using bis-tris propane. Error bars indicate the standard deviation between measurements in at least three different nanopores.

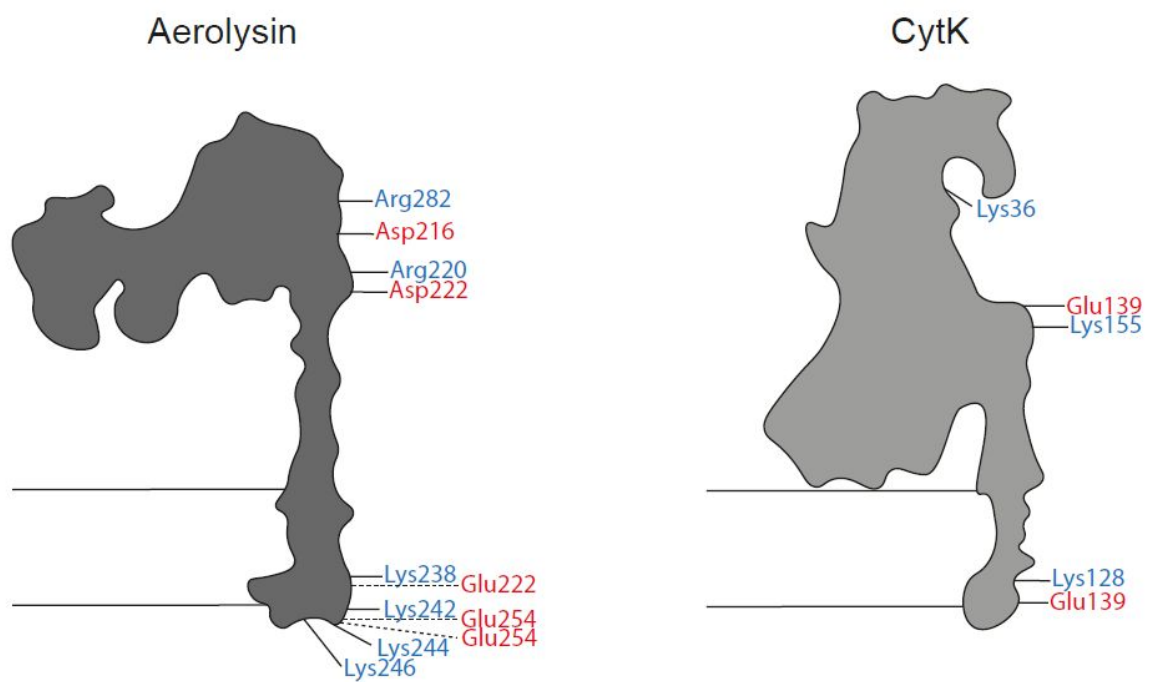

**Figure S10:** Schematic illustration of the positions of charged residues in the lumen of the Aerolysin (left) and CytK (right) nanopore.

| Name  | Peptide sequence                                                  | Position in the protein | Mass (Da)*     |
|-------|-------------------------------------------------------------------|-------------------------|----------------|
| Lys10 | NLC <sub>m</sub> NIPC <sub>m</sub> SALLSSDITASVNC <sub>m</sub> AK | 92-114                  | 2508.19        |
| Lys9  | <b>NTDGSTDYGILQINSR</b>                                           | <b>64-79</b>            | <b>1753.84</b> |
| Lys8  | <b>IVSDGNGMNAWVAWR</b>                                            | <b>116-130</b>          | <b>1675.80</b> |
| Lys7  | <b>FESNFNTQATNR</b>                                               | <b>52-63</b>            | <b>1428.65</b> |
| Lys6  | <b>GYSLGNWVC<sub>m</sub>AAK</b>                                   | <b>40-51</b>            | <b>1325.63</b> |
| Lys5  | <b>GTDVQAWIR</b>                                                  | <b>135-143</b>          | <b>1045.54</b> |
| Lys4  | <b>WWC<sub>m</sub>NDGR</b>                                        | <b>80-86</b>            | <b>993.39</b>  |
| Lys3  | <b>HGLDNYR</b>                                                    | <b>33-39</b>            | <b>874.42</b>  |
| Lys2  | <b>C<sub>m</sub>ELAAAMK</b>                                       | <b>24-31</b>            | <b>893.42</b>  |
| Lys1  | TPGSR                                                             | 87-91                   | 517.27         |

**Table S1: Expected peptide fragments after complete tryptic digestion of Lysozyme from *gallus gallus*.** In bold are the peptides observed by Aerolysin and CytK nanopores.\*Cysteine residues are acetylated using iodoacetamide forming carbamidomethyl-cysteine (+57.02 Da mass shift compared to unmodified cysteine).

| Peptide                                                           | Name  | Mass    | Length | m/z     | RT (min) | Area 2-Digest | Accession  | PTM                                    |
|-------------------------------------------------------------------|-------|---------|--------|---------|----------|---------------|------------|----------------------------------------|
| NLC(+57.02)NIPC(+57.02)SALLSSDITASVNC(+57.02)AK                   | Lys10 | 2507.18 | 23     | 1254.60 | 60.7     | 8.95E+08      | LYSC_CHICK | Carbamidomethylation                   |
| <b>FESNFNTQATNR</b>                                               | Lys7  | 1427.64 | 12     | 714.83  | 28.3     | 7.86E+08      | LYSC_CHICK |                                        |
| GYSLGNWVC(+57.02)AAK                                              | Lys6  | 1324.62 | 12     | 663.32  | 47.5     | 7.47E+08      | LYSC_CHICK | Carbamidomethylation                   |
| NTDGSTDYGILQINSR                                                  | Lys9  | 1752.83 | 16     | 877.42  | 43.5     | 6.97E+08      | LYSC_CHICK |                                        |
| GTDVQAWIR                                                         | Lys5  | 1044.54 | 9      | 523.27  | 45.4     | 6.83E+08      | LYSC_CHICK |                                        |
| WWC(+57.02)NDGR                                                   | Lys4  | 992.39  | 7      | 497.20  | 28.7     | 3.57E+08      | LYSC_CHICK | Carbamidomethylation                   |
| N(+.98)NTDGSTDYGILQINSR                                           | Lys9  | 1753.81 | 16     | 877.92  | 44.7     | 3.00E+08      | LYSC_CHICK | Deamidation (NQ)                       |
| NTDGSTDYGILQIN(+.98)SR                                            | Lys9  | 1753.81 | 16     | 877.92  | 44.7     | 2.32E+08      | LYSC_CHICK | Deamidation (NQ)                       |
| SALLSSDITASVNC(+57.02)AK                                          |       | 1635.81 | 16     | 818.91  | 50.7     | 2.09E+08      | LYSC_CHICK | Carbamidomethylation                   |
| NLC(+57.02)NIPC(+57.02)SALLSSDITASVN                              |       | 2148.02 | 20     | 1075.02 | 70.2     | 1.75E+08      | LYSC_CHICK | Carbamidomethylation                   |
| IVSDGDM(+15.99)NAWVAWR                                            | Lys8  | 1691.77 | 15     | 846.89  | 49.0     | 1.72E+08      | LYSC_CHICK | Oxidation (M)                          |
| N(+.98)LC(+57.02)N(+.98)IPC(+57.02)SALLSSDITASVN(+.98)C(+57.02)AK | Lys10 | 2510.13 | 23     | 1256.10 | 62.0     | 1.31E+08      | LYSC_CHICK | Deamidation (NQ); Carbamidomethylation |
| NLC(+57.02)N(+.98)IPC(+57.02)SALLSSDITASVNC(+57.02)AK             | Lys10 | 2508.17 | 23     | 1255.10 | 64.2     | 1.17E+08      | LYSC_CHICK | Carbamidomethylation; Deamidation (NQ) |
| IVSDGDMNAWVAWR                                                    | Lys8  | 1675.78 | 15     | 838.90  | 56.8     | 1.15E+08      | LYSC_CHICK |                                        |
| <b>FESNFN(+.98)TQATNR</b>                                         | Lys7  | 1428.63 | 12     | 715.32  | 26.3     | 8.82E+07      | LYSC_CHICK | Deamidation (NQ)                       |
| NTDGSTDYGILQIN                                                    |       | 1509.69 | 14     | 755.85  | 49.1     | 7.76E+07      | LYSC_CHICK |                                        |
| PPGMPYNR                                                          |       | 930.44  | 8      | 466.22  | 10.6     | 6.84E+07      |            |                                        |
| GYSLGN(+.98)WVC(+57.02)AAK                                        | Lys 6 | 1325.61 | 12     | 663.81  | 45.1     | 6.80E+07      | LYSC_CHICK | Deamidation (NQ); Carbamidomethylation |
| SLGNWVC(+57.02)AAK                                                |       | 1104.54 | 10     | 553.28  | 38.0     | 4.85E+07      | LYSC_CHICK | Carbamidomethylation                   |
| IVSDGNGMNAWVAWR                                                   |       | 1674.79 | 15     | 838.41  | 55.7     | 4.12E+07      | LYSC_CHICK |                                        |
| WWC(+57.02)N(+.98)DGR                                             | Lys4  | 993.38  | 7      | 497.70  | 24.8     | 3.97E+07      | LYSC_CHICK | Carbamidomethylation; Deamidation (NQ) |
| C(+57.02)ELAAAMK                                                  | Lys 2 | 892.41  | 8      | 447.21  | 21.7     | 3.80E+07      | LYSC_CHICK | Carbamidomethylation                   |
| GYSLGNWVC(+57.02)                                                 |       | 1054.45 | 9      | 528.23  | 50.9     | 3.71E+07      | LYSC_CHICK | Carbamidomethylation                   |
| NLC(+57.02)NIPC(+57.02)                                           |       | 889.38  | 7      | 445.70  | 30.7     | 3.55E+07      | LYSC_CHICK | Carbamidomethylation                   |
| <b>FESNFN(+.98)FNTQATNR</b>                                       |       | 1428.63 | 12     | 715.33  | 25.8     | 3.35E+07      | LYSC_CHICK | Deamidation (NQ)                       |
| IVSDGDM(+15.99)NAWVAWR                                            |       | 1690.79 | 15     | 846.40  | 47.4     | 3.30E+07      | LYSC_CHICK | Oxidation (M)                          |
| N(+.98)TDGSTDYGILQIN                                              |       | 1510.68 | 14     | 756.35  | 50.7     | 2.85E+07      | LYSC_CHICK | Deamidation (NQ)                       |
| NLC(+57.02)NIPC(+57.02)SALLSSDITASVN(+.98)C(+57.02)AK             | Lys10 | 2508.17 | 23     | 1255.10 | 63.5     | 2.69E+07      | LYSC_CHICK | Carbamidomethylation; Deamidation (NQ) |
| N(+.98)LC(+57.02)N(+.98)IPC(+57.02)SALLSSDITASVN                  |       | 2149.99 | 20     | 1076.01 | 65.7     | 2.40E+07      | LYSC_CHICK | Deamidation (NQ); Carbamidomethylation |

**Table S2: Detected peptides in the mass-spectrometry measurement of trypsinated lysozyme.** The columns indicate (from left to right): the sequence, the name (according to table S1), the mass (in Da), the length of the peptide, the retention time (RT) on the HPLC column, the peak area (Area 2-Digest), which relates to the concentration in the sample, the Accession code (LYSC\_CHICK = lysozyme from *gallus gallus*), and any detected PTM in the peptide. Only the 30 peptides with the highest peak area are shown. Peptide lys7 is highlighted in green and deaminated forms of lys7 are highlighted in orange.

|                            | $\mu_{lys4}$ (I <sub>ex</sub> %) | $\sigma_{lys4}$ (I <sub>ex</sub> %) | $\mu_{lys5}$ (I <sub>ex</sub> %) | $\sigma_{lys5}$ (I <sub>ex</sub> %) | Resolution  |
|----------------------------|----------------------------------|-------------------------------------|----------------------------------|-------------------------------------|-------------|
| Aer <sup>K238D</sup>       | 31.4 ± 0.4                       | 1.67 ± 0.03                         | n.d.                             | n.d.                                | n.d.        |
| Aer <sup>K238D+A260F</sup> | 54.4 ± 0.8                       | 1.05 ± 0.18                         | 58.5 ± 0.6                       | 1.71 ± 0.31                         | 2.98 ± 0.21 |
| Aer <sup>K238D+S264F</sup> | 54.6 ± 1.0                       | 0.94 ± 0.07                         | 59.2 ± 1.2                       | 0.62 ± 0.29                         | 5.97 ± 1.28 |
| Aer <sup>K238D+Q268F</sup> | 34.0 ± 0.3                       | 0.87 ± 0.10                         | 37.0 ± 0.4                       | 2.32 ± 0.23                         | 1.86 ± 0.13 |
| Aer <sup>K238D+S272F</sup> | 41.2 ± 0.1                       | 2.74 ± 0.21                         | 48.7 ± 0.8                       | 5.22 ± 0.28                         | 1.87 ± 0.28 |

**Table S3: Resolution of peptides in the phenylalanine mutants.**  $\mu_i$  indicates the mean and  $\sigma_i$  the standard deviation of the peptide blockades. Errors indicate the standard error between measurements in three different nanopores.

|                             |        | Reversal potential | P(K)/P(Cl)  | Net charge of the barrel |
|-----------------------------|--------|--------------------|-------------|--------------------------|
| Aer <sup>Wt</sup>           | pH 7.5 | -3.9 ± 1.4 mV      | 0.76 ± 0.07 | 0                        |
| Aer <sup>Wt</sup>           | pH 3.8 | -12.9 ± 1.0 mV     | 0.38 ± 0.03 | +7                       |
| Aer <sup>K238D</sup>        | pH 3.8 | -8.8 ± 0.9 mV      | 0.53 ± 0.04 | +2                       |
| Aer <sup>K238D</sup>        | pH 3.0 | -11.4 ± 0.6 mV     | 0.43 ± 0.02 | +10                      |
| Aer <sup>K238D+A260F</sup>  | pH 3.0 | -9.3 ± 0.3 mV      | 0.50 ± 0.01 | +10                      |
|                             |        |                    |             |                          |
| CytK <sup>Wt</sup>          | pH 7.5 | +0.4 ± 0.3 mV      | 1.02 ± 0.02 | 0                        |
| CytK <sup>Wt</sup>          | pH 3.8 | -7.7 ± 0.9 mV      | 0.58 ± 0.03 | +5                       |
| CytK <sup>K128D</sup>       | pH 3.8 | +1.3 ± 0.7 mV      | 1.10 ± 0.05 | +1                       |
| CytK <sup>K128D</sup>       | pH 3.0 | -0.1 ± 0.7 mV      | 0.99 ± 0.05 | +7                       |
| CytK <sup>S126F+K128D</sup> | pH 3.0 | +0.0 ± 0.1 mV      | 1.00 ± 0.02 | +7                       |

**Table S4: Reversal potential measurements of aerolysin and CytK nanopores.** The reversal potential was measured under asymmetric salt conditions with 0.5 M KCl in the *trans* compartment and 2M KCl in the *cis* compartment, buffered to the appropriated pH using Tris (pH 7.5) or citric acid and bis-tris propane (pH 3.0 and 3.8). The error represents the standard deviation between three measurements in different pores. The last column shows the calculated charge in the barrel at the given pH in 150 mM NaCl, as described in the Methods.

**Table S5: Ionic current versus the voltage of aerolysin mutants in 1M KCl at pH 3.8**

| Voltage (mV) | Aer <sup>Wt</sup> (pA) | Aer <sup>K238Q</sup> (pA) | Aer <sup>K238D</sup> (pA) | Aer <sup>K238W</sup> (pA) | Aer <sup>K238F</sup> (pA) |
|--------------|------------------------|---------------------------|---------------------------|---------------------------|---------------------------|
| -100         | -61.7 ± 4.2            | -63.1 ± 1.3               | -60.7 ± 0.6               | -59.2 ± 1.1               | -60.3 ± 6.7               |
| -95          | -57.8 ± 4.7            | -59.4 ± 1.3               | -57.9 ± 0.6               | -56.0 ± 1.2               | -57.4 ± 6.2               |
| -90          | -55.1 ± 3.5            | -56.6 ± 1.4               | -55.1 ± 0.7               | -53.0 ± 1.2               | -54.3 ± 5.6               |
| -85          | -52.0 ± 3.3            | -53.5 ± 1.3               | -52.2 ± 0.7               | -50.0 ± 1.1               | -51.2 ± 5.2               |
| -80          | -48.9 ± 3.0            | -50.5 ± 1.3               | -49.3 ± 0.7               | -46.6 ± 0.5               | -48.2 ± 4.8               |
| -75          | -45.8 ± 2.8            | -47.4 ± 1.2               | -46.4 ± 0.6               | -43.7 ± 0.4               | -45.2 ± 4.5               |
| -70          | -42.7 ± 2.5            | -44.2 ± 1.0               | -43.4 ± 0.5               | -40.7 ± 0.4               | -42.2 ± 4.1               |
| -65          | -39.6 ± 2.2            | -41.3 ± 1.1               | -40.5 ± 0.6               | -38.0 ± 0.8               | -39.2 ± 3.6               |
| -60          | -36.5 ± 2.0            | -38.3 ± 1.1               | -37.5 ± 0.6               | -35.1 ± 0.7               | -36.2 ± 3.3               |
| -55          | -33.4 ± 1.7            | -35.2 ± 1.0               | -34.5 ± 0.6               | -32.0 ± 0.3               | -33.3 ± 3.0               |
| -50          | -30.5 ± 1.6            | -32.1 ± 1.0               | -31.5 ± 0.5               | -29.0 ± 0.2               | -30.2 ± 2.5               |
| -45          | -27.4 ± 1.4            | -29.0 ± 0.9               | -28.5 ± 0.5               | -26.2 ± 0.4               | -27.3 ± 2.2               |
| -40          | -24.3 ± 1.1            | -25.9 ± 0.8               | -25.4 ± 0.5               | -23.1 ± 0.1               | -24.2 ± 1.8               |
| -35          | -21.3 ± 1.0            | -22.7 ± 0.7               | -22.2 ± 0.5               | -20.2 ± 0.1               | -21.2 ± 1.6               |
| -30          | -18.2 ± 0.9            | -19.5 ± 0.7               | -19.2 ± 0.4               | -17.4 ± 0.3               | -18.2 ± 1.3               |
| -25          | -15.2 ± 0.7            | -16.4 ± 0.6               | -16.1 ± 0.4               | -14.3 ± 0.2               | -15.2 ± 1.0               |
| -20          | -12.1 ± 0.5            | -13.1 ± -0.6              | -12.9 ± 0.3               | -11.4 ± 0.2               | -12.1 ± 0.8               |
| -15          | -9.1 ± 0.4             | -9.8 ± 0.5                | -9.8 ± 0.3                | -8.5 ± 0.3                | -9.1 ± 0.5                |
| -10          | -6.1 ± 0.2             | -6.6 ± 0.5                | -6.6 ± 0.3                | -5.7 ± 0.3                | -6.1 ± 0.4                |
| -5           | -3.1 ± 0.1             | -3.3 ± 0.4                | -3.5 ± 0.2                | -2.8 ± 0.3                | -3.1 ± 0.2                |
| 0            | -0.1 ± 0.5             | -0.0 ± 0.4                | -0.3 ± 0.2                | 0.1 ± 0.3                 | 0.0 ± 0.1                 |
| 5            | 3.0 ± 0.1              | 3.2 ± 0.4                 | 2.9 ± 0.1                 | 2.9 ± 0.3                 | 2.9 ± 0.2                 |
| 10           | 5.9 ± 0.2              | 6.5 ± 0.4                 | 6.0 ± 0.1                 | 5.7 ± 0.4                 | 5.9 ± 0.3                 |
| 15           | 9.0 ± 0.4              | 9.8 ± 0.4                 | 9.2 ± 0.2                 | 8.4 ± 0.4                 | 8.8 ± 0.5                 |
| 20           | 11.9 ± 0.5             | 13.0 ± 0.4                | 12.3 ± 0.1                | 11.3 ± 0.4                | 11.7 ± 0.6                |
| 25           | 14.8 ± 0.5             | 16.2 ± 0.5                | 15.4 ± 0.1                | 13.9 ± 0.3                | 14.6 ± 0.8                |
| 30           | 17.6 ± 0.7             | 19.3 ± 0.5                | 18.5 ± 0.1                | 16.6 ± 0.3                | 17.4 ± 0.9                |
| 35           | 20.5 ± 0.7             | 22.4 ± 0.5                | 21.5 ± 0.1                | 19.3 ± 0.4                | 20.1 ± 1.1                |
| 40           | 23.3 ± 0.8             | 25.5 ± 0.5                | 24.6 ± 0.1                | 22.0 ± 0.4                | 22.9 ± 1.2                |
| 45           | 25.9 ± 0.8             | 28.6 ± 0.6                | 27.6 ± 0.1                | 24.5 ± 0.3                | 25.5 ± 1.3                |
| 50           | 28.6 ± 0.8             | 31.6 ± 0.6                | 30.6 ± 0.1                | 27.1 ± 0.4                | 28.1 ± 1.5                |
| 55           | 31.2 ± 0.9             | 34.5 ± 0.7                | 33.6 ± 0.1                | 29.5 ± 0.3                | 30.7 ± 1.6                |
| 60           | 33.9 ± 1.1             | 37.4 ± 0.7                | 36.6 ± 0.2                | 31.9 ± 0.3                | 33.2 ± 1.7                |
| 65           | 36.7 ± 1.3             | 40.2 ± 0.7                | 39.5 ± 0.2                | 34.4 ± 0.2                | 35.7 ± 2.0                |
| 70           | 39.2 ± 1.2             | 43.0 ± 0.8                | 42.4 ± 0.3                | 36.8 ± 0.3                | 38.2 ± 2.0                |
| 75           | 41.6 ± 1.2             | 45.8 ± 0.8                | 45.2 ± 0.5                | 39.2 ± 0.4                | 40.5 ± 2.2                |
| 80           | 44.2 ± 1.3             | 48.4 ± 0.9                | 48.2 ± 0.4                | 41.5 ± 0.3                | 42.9 ± 2.3                |
| 85           | 46.7 ± 1.5             | 51.1 ± 1.0                | 51.1 ± 0.5                | 43.8 ± 0.3                | 45.2 ± 2.5                |
| 90           | 49.1 ± 1.5             | 53.8 ± 1.1                | 54.0 ± 0.6                | 46.1 ± 0.3                | 47.6 ± 2.7                |
| 95           | 51.6 ± 1.8             | 56.3 ± 1.2                | 57.0 ± 0.6                | 48.3 ± 0.4                | 49.9 ± 2.8                |
| 100          | 54.3 ± 2.0             | 59.2 ± 1.3                | 60.4 ± 0.6                | 50.9 ± 0.5                | 52.6 ± 3.1                |

**Table S6: Ionic current versus the voltage of CytK mutants in 1M KCl at pH 3.8**

| Voltage (mV) | CytK <sup>Wt</sup> (pA) | CytK <sup>K128F</sup> (pA) | CytK <sup>K128D</sup> (pA) | CytK <sup>S126F</sup> (pA) |
|--------------|-------------------------|----------------------------|----------------------------|----------------------------|
| -100         | -110.1 ± 1.8            | -98.0 ± 1.1                | -99.9 ± 1.4                | -112.8 ± 0.5               |
| -95          | -104.4 ± 1.7            | -93.6 ± 0.9                | -95.5 ± 1.4                | -106.5 ± 0.4               |
| -90          | -98.5 ± 1.7             | -89.2 ± 0.9                | -91.5 ± 1.3                | -100.0 ± 0.6               |
| -85          | -92.6 ± 1.7             | -84.7 ± 1.0                | -86.9 ± 1.4                | -94.3 ± 0.4                |
| -80          | -87.0 ± 1.6             | -80.2 ± 1.0                | -82.4 ± 1.3                | -87.4 ± 1.7                |
| -75          | -81.3 ± 1.5             | -75.6 ± 0.8                | -77.9 ± 1.3                | -82.3 ± 0.3                |
| -70          | -75.6 ± 1.5             | -71.0 ± 0.8                | -73.3 ± 1.2                | -76.4 ± 0.3                |
| -65          | -69.9 ± 1.5             | -66.3 ± 0.9                | -68.6 ± 1.1                | -70.5 ± 0.3                |
| -60          | -64.4 ± 1.4             | -61.6 ± 0.8                | -63.8 ± 1.1                | -64.8 ± 0.3                |
| -55          | -58.8 ± 1.4             | -56.8 ± 0.8                | -59.0 ± 0.9                | -59.1 ± 0.3                |
| -50          | -53.3 ± 1.3             | -52.0 ± 0.8                | -54.0 ± 0.9                | -53.4 ± 0.2                |
| -45          | -47.8 ± 1.3             | -47.2 ± 0.7                | -49.0 ± 0.9                | -47.8 ± 0.2                |
| -40          | -42.4 ± 1.2             | -42.1 ± 0.7                | -43.9 ± 0.8                | -42.3 ± 0.2                |
| -35          | -37.1 ± 1.2             | -37.3 ± 0.7                | -38.7 ± 0.8                | -36.9 ± 0.2                |
| -30          | -31.7 ± 1.1             | -32.3 ± 0.7                | -33.4 ± 0.7                | -31.5 ± 0.2                |
| -25          | -26.4 ± 1.0             | -27.3 ± 0.6                | -28.0 ± 0.7                | -26.1 ± 0.2                |
| -20          | -21.1 ± 1.0             | -22.2 ± 0.6                | -22.6 ± 0.6                | -20.9 ± 0.2                |
| -15          | -15.9 ± 0.9             | -17.1 ± 0.6                | -17.1 ± 0.6                | -15.7 ± 0.1                |
| -10          | -10.7 ± 0.9             | -12.0 ± 0.5                | -11.5 ± 0.5                | -10.6 ± 0.2                |
| -5           | -5.5 ± 0.8              | -6.7 ± 0.5                 | -5.9 ± 0.5                 | -5.5 ± 0.2                 |
| 0            | -0.4 ± 0.8              | -1.5 ± 0.5                 | -0.2 ± 0.4                 | -0.4 ± 0.2                 |
| 5            | 4.7 ± 0.7               | 3.8 ± 0.5                  | 5.6 ± 0.4                  | 4.6 ± 0.2                  |
| 10           | 9.7 ± 0.6               | 9.1 ± 0.5                  | 11.5 ± 0.3                 | 9.5 ± 0.2                  |
| 15           | 14.7 ± 0.6              | 14.4 ± 0.5                 | 17.4 ± 0.3                 | 14.4 ± 0.2                 |
| 20           | 19.6 ± 0.5              | 19.8 ± 0.4                 | 23.3 ± 0.3                 | 19.2 ± 0.2                 |
| 25           | 24.5 ± 0.5              | 25.2 ± 0.4                 | 29.4 ± 0.3                 | 24.0 ± 0.2                 |
| 30           | 29.3 ± 0.4              | 30.7 ± 0.4                 | 35.4 ± 0.3                 | 28.8 ± 0.3                 |
| 35           | 34.1 ± 0.4              | 36.1 ± 0.4                 | 41.6 ± 0.3                 | 33.4 ± 0.3                 |
| 40           | 38.8 ± 0.4              | 41.6 ± 0.4                 | 47.8 ± 0.3                 | 37.9 ± 0.3                 |
| 45           | 43.5 ± 0.4              | 47.1 ± 0.2                 | 54.0 ± 0.3                 | 42.4 ± 0.4                 |
| 50           | 48.0 ± 0.4              | 52.6 ± 0.1                 | 60.3 ± 0.3                 | 46.9 ± 0.4                 |
| 55           | 52.8 ± 0.5              | 58.1 ± 0.1                 | 66.6 ± 0.4                 | 51.3 ± 0.5                 |
| 60           | 57.2 ± 0.5              | 63.8 ± 0.2                 | 73.0 ± 0.4                 | 55.7 ± 0.5                 |
| 65           | 61.8 ± 0.6              | 69.4 ± 0.2                 | 79.5 ± 0.5                 | 59.9 ± 0.6                 |
| 70           | 66.2 ± 0.7              | 75.1 ± 0.3                 | 86.0 ± 0.5                 | 64.2 ± 0.6                 |
| 75           | 70.7 ± 0.8              | 80.0 ± 1.4                 | 92.5 ± 0.5                 | 68.3 ± 0.7                 |
| 80           | 75.2 ± 1.3              | 86.5 ± 0.4                 | 99.1 ± 0.6                 | 71.9 ± 1.0                 |
| 85           | 79.4 ± 1.0              | 92.3 ± 0.4                 | 105.7 ± 0.7                | 76.6 ± 0.9                 |
| 90           | 83.8 ± 1.0              | 98.2 ± 0.5                 | 112.4 ± 0.8                | 80.6 ± 1.0                 |
| 95           | 88.1 ± 0.9              | 104.2 ± 0.5                | 119.3 ± 0.9                | 84.7 ± 1.3                 |
| 100          | 92.8 ± 0.9              | 111.1 ± 0.4                | 126.8 ± 1.0                | 88.9 ± 1.9                 |



### Amino acid sequence of pro-Aer<sup>Wt</sup>

MAEPVYPDQLRFLSLGQGVCGDKYRPVNREEAQS VKSNIVGMMGQWQISGLANGWVIMG  
PGYNGEIKPGTASNTWCYPTNPVTGEIPTLSALDIPDGDEV DVQWRLVHDSANFIKPTS YLA  
HYLGYAWVGGNHSQYVGEDMDVTRDGDGWVIRGNNDGGCDGYRCGDKTAIKVSNFAYN  
LDPDSFKHGDVTQSDRQLVKT VVGWAVNDS DTPQSGYDVTLRYDTATNWSKTNTYGLSEK  
VTTKNKFKWPLVGETEL SIEIAANQSWASQNGGSTTTTSLSQSVRPTV PARSKIPVKIELYKAD  
ISYPYEFKADVSYDLT LSGFLRWGGNAWYTHPDNRPNWNHTFVIGPYKDKASSIRYQWDK  
RYIPGEVKWWDWNWTIQQNGLSTMQNNLARVLRPV RAGITGDFSAESQFAGNIEIGAPVPL  
AADSKVRRARSVDGAGQGLRLEIPLDAQELSGLGFNNVSLSVTPAANQGSSHHHHHH

### DNA sequence of pro-Aerolysin gene

ATGGCGGAGCCGGTCTATCCGGATCAACTCCGGCTCTTCTCATTAGGCCAGGGTGTCT  
GCGGTGACAAATATCGTCTGTTAATCGGGAGGAGGCTCAATCGGTCAAATCAAACATC  
GTGGGTATGATGGGCCAATGGCAGATTAGTGGCCTGGCCAACGGTTGGGTAATTATGG  
GGCCGGGGTACAACGGCGAGATCAAACCTGGCACCGCGTCGAACACTTGGTGCTACC  
CTACTAATCCAGTGACAGGTGAGATTCCAACCTTGT CAGCGCTCGATATCCCGGACGGC  
GACGAAGTGGATGTT CAGTGGCGCCTTGTT CATGACAGTGCGAATTT CATCAAACCTAC  
TAGTTACTTAGCCATTATTTGGGGTATGCGTGGGTTGGCGGCAACCACAGTCAGTAT  
GTAGGGGAAGACATGGATGTTACACGGGACGGCGACGGCTGGGTGATCCGCGGGAAC  
AACGACGGGGGCTGTGACGGCTACCGTTGCGGCGACAAAACGGCGATTAAGGTGTCC  
AATTTTGCATATAACCTTGATCCTGATTCGTTCAAACACGGGGACGTGACGCAAAGTGA  
CCGCCAACTCGTAAAGACTGTTGTAGGCTGGGCTGTGAACGACAGTGACACGCCACAG  
AGTGGCTACGACGTTACTCTTCGTTACGACACGGCAACGAACTGGTCTAAAACGAACAC  
TTACGGTCTCTCTGAAAAAGTCACTACCAAAAACAAGTTCAAGTGGCCGTTGGTAGGCG  
AAACAGA ACTCAGCATCGAAATCGCAGCCAACCAAAGTTGGGCTAGTCAAACGGCGG  
GAGCACAACGACGTCGCTGAGTCAATCCGTCCGCCAACTGTGCCTGCTCGTTCCAAG  
ATCCCAGTCAA AATTGAATTATATAAAGCTGATATTTCTTACCCTTATGAATTTAAGGCAG  
ATGTTAGTTACGACCTGACGTTATCGGGGTTCTCCGCTGGGGTGGTAATGCTTGGTAT  
ACTCACCCGGATAACCGTCCAACTGGAATCACACGTTCTGATCGGTCCGTACAAAGA  
TAAGGCGAGCTCTATCCGCTATCAATGGGACAAGCGCTATATCCCTGGCGAAGTTAAAT  
GGTGGGACTGGAATTGGACTATCCAACAGAACGGCCTCTCTACAATGCAAAAACAACCTG  
GCCCGCTACTGCGGCCAGTTCGGGCGGGCATTACGGGGGACTTCTCCGCAGAAAGC  
CAGTTTGCCGGCAATATCGAAATCGGGGCACCGGTTCTCTCGCCGCTGATTCTAAGGT  
ACGTCGGGCACGGTCCGTGGACGGTGCGGGGCAGGGGTTGCGTCTGGAGATTCCGCT  
TGACGCCCAAGAGTTGTCGGGGTTAGGTTTTTAACAATGTGTCCTTGAGTGTACACCAG  
CCGCTAACCAAGGGTCTCTCATCACCATCACCACCAC

### **DNA sequence of CytK gene**

CAAAAACCATGGCGCAAACGACTTCACAGGTTGTAACAGATATAGGCCAGAATGCTAAA  
ACCCATACCAGCTACAATACCTTCAACAACGAACAAGCGGACAACATGACCATGAGCCT  
GAAGGTGACGTTTCATCGATGATCCGAGCGCAGACAAACAAATTGCGGTTATCAACACCA  
CCGGCTCGTTCATGAAAGCAAATCCGACTCTGAGCGACGCACCGGTTGATGGTTACCC  
GATTCCGGGCGCGTCTGTGACCCTGCGCTATCCGAGCCAATATGATATTGCCATGAACC  
TCCAGGACAATACCTCGCGCTTTTTCCACGTGGCGCCAACGAACGCTGTGAGGAAAC  
GACTGTTACCAGCAGTGTCTCCTACCAGTTGGGTGGTTCTATCAAGGCTAGCGTGACCC  
CGTCCGGCCCTTCTGGTGAGTCCGGTGCGACCGGTCAGGTTACCTGGTCAGATTCCGT  
TAGCTACAAACAAACCTCCTACAAGACGAACCTGATCGACCAGACGAACAAGCACGTG  
AAATGGAACGTGTTTTTAAACGGCTACAACAATCAAACCTGGGGTATTTATACCCGTGAT  
AGCTACCATGCGCTGTATGGCAATCAGTTGTTTATGTATAGCCGTACCTATCCGCATGA  
GACGGATGCGCGTGGTAACCTTGTTCCAATGAACGATCTGCCGACTTTGACCAACAGC  
GGCTTCAGCCCGGGTATGATCGCGGTTGTTATTAGCGAAAAGGACACCGAACAGAGCT  
CGATCCAGGTAGCCTATACCAAACACGCTGACGACTACACCTTACGTCCGGGCTTTACC  
TTTGGTACAGGCAACTGGGTTGGTAATAACATCAAGGACGTGGACCAAAAACTTTCAA  
TAAGTCTTTCGTGCTGGATTGAAAAATAAGAAGCTGGTCGAGAAAAAGGGCTCCGCGC  
ATCAGCAGCATCATCAGTAG

### **Amino acid sequence of CytK<sup>wt</sup>**

MAQTTSQVVDIGQNAKTHTSYNTFNNEQADNMTMSLKVTFIDDPADKQIAVINTTGSFMK  
ANPTLSDAPVDGYPIPGASVTLRYPQYDIAMNLQDNTSRFFHVAPTNAVEETTSSVSYQ  
LGGSIDASVTPSPGSGESGATGQVTWSDSVSYKQTSYKTNLIDQTNKHVKWNVFFNGYNN  
QNWGIYTRDSYHALYGNQLFMYSRTYPHETDARGNLVPMNDLPTLTNSGFSPGMIAVVISE  
KDTEQSSIQVAYTKHADDYTLRPGFTFGTGNWVGNNIKDVDQKTFNKSFVLDWKNKKLVEK  
KSAHHHHHH
